# Supplementary material for: Impacts of marine instability across the East Antarctic IceSheet on Southern Ocean dynamics
Source: Copernicus journal article supplement (doi:10.5194/tc-10-2317-2016), 2016-09-30
Supplement: Supplementary file 1 [file tc-10-2317-2016-supplement.zip]

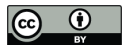

## *Supplement of*

# **Impacts of marine instability across the East Antarctic Ice Sheet on Southern Ocean dynamics**

**Steven J. Phipps et al.**

*Correspondence to:* Steven J. Phipps (Steven.Phipps@utas.edu.au)

- tc-10-2317-2016-supplement-title-page.pdf

- |               |               |               |
|---------------|---------------|---------------|
| • data        | – figure5e.nc | – figure8a.nc |
| – figure2.nc  | – figure5f.nc | – figure8b.nc |
| – figure3a.nc | – figure5g.nc | – figure8c.nc |
| – figure3b.nc | – figure5h.nc | – figure8d.nc |
| – figure4a.nc | – figure6a.nc | – figure8e.nc |
| – figure4b.nc | – figure6b.nc | – figure8f.nc |
| – figure4c.nc | – figure6c.nc | – figure8g.nc |
| – figure4d.nc | – figure6d.nc | – figure8h.nc |
| – figure4e.nc | – figure7a.nc | – figure9a.nc |
| – figure4f.nc | – figure7b.nc | – figure9b.nc |
| – figure4g.nc | – figure7c.nc | – figure9c.nc |
| – figure4h.nc | – figure7d.nc | – figure9d.nc |
| – figure5a.nc | – figure7e.nc | – figure9e.nc |
| – figure5b.nc | – figure7f.nc | – figure9f.nc |
| – figure5c.nc | – figure7g.nc | – figure9g.nc |
| – figure5d.nc | – figure7h.nc | – figure9h.nc |

The copyright of individual parts of the supplement might differ from the CC-BY 3.0 licence.
